# Supplementary material
Source: HighWire-hosted journal article supplement (http://www.ajnr.org/highwire/filestream/52021/field_highwire_adjunct_files/0/2045_tables.pdf)
Supplement: 2045_tables.pdf [file 2045_tables.pdf]

**On-line Table 1: Summary of clinical and biochemical profile of controls and patients with and without MHE**

| Parameters                       | Healthy controls | No MHE       | MHE          | P Values <sup>a</sup> |                   |               |
|----------------------------------|------------------|--------------|--------------|-----------------------|-------------------|---------------|
|                                  |                  |              |              | Control vs MHE        | Control vs No MHE | MHE vs No MHE |
| Pediatric age group (mean ± SD)  |                  |              |              |                       |                   |               |
| Age (years)                      | 9.80 ± 2.10      | 9.60 ± 1.80  | 9.30 ± 1.00  | NS                    | NS                | NS            |
| Spleen size (cm)                 | Not palpable (0) | 7.80 ± 3.80  | 8.70 ± 1.50  | S                     | S                 | NS            |
| ALT (U/L)                        | 30.2 ± 11.0      | 32.2 ± 14.4  | 38.2 ± 14.5  | NS                    | NS                | NS            |
| AST (U/L)                        | 42.0 ± 11.0      | 48.1 ± 18.2  | 36.5 ± 10.7  | NS                    | NS                | NS            |
| SB (mg/dl)                       | 1.20 ± 0.40      | 1.00 ± 0.80  | 1.80 ± 1.80  | NS                    | NS                | NS            |
| Albumin (mg/dl)                  | 4.90 ± 0.60      | 4.60 ± 0.50  | 4.20 ± 0.50  | NS                    | NS                | NS            |
| PT (seconds)                     | 12.0 ± 2.20      | 14.0 ± 2.50  | 13.70 ± 1.80 | NS                    | NS                | NS            |
| BA level (μmol/L)                | 41.9 ± 1.5       | 128.8 ± 25.5 | 144.7 ± 25.4 | S                     | S                 | NS            |
| Adolescent age group (mean ± SD) |                  |              |              |                       |                   |               |
| Age (years)                      | 16.50 ± 1.20     | 16.70 ± 1.0  | 15.80 ± 2.0  | NS                    | NS                | NS            |
| Spleen size (cm)                 | Not palpable (0) | 8.60 ± 5.0   | 8.50 ± 4.2   | S                     | S                 | NS            |
| ALT (U/L)                        | 33.10 ± 12       | 30.90 ± 8.1  | 35.30 ± 11.4 | NS                    | NS                | NS            |
| AST (U/L)                        | 40.0 ± 14        | 36.4 ± 9.2   | 46.8 ± 15.0  | NS                    | NS                | NS            |
| SB (mg/dl)                       | 1.4 ± 0.50       | 1.6 ± 0.90   | 1.1 ± 0.90   | NS                    | NS                | NS            |
| Albumin (mg/dl)                  | 4.4 ± 0.50       | 4.3 ± 0.50   | 3.7 ± 0.60   | NS                    | NS                | NS            |
| PT (seconds)                     | 15 ± 1.2         | 14.0 ± 1.0   | 16.9 ± 3.9   | NS                    | NS                | NS            |
| BA level (μmol/L)                | 43.8 ± 1.5       | 125.2 ± 45.3 | 130.2 ± 26.4 | S                     | S                 | NS            |
| Adult age group (mean ± SD)      |                  |              |              |                       |                   |               |
| Age (years)                      | 28.2 ± 4.2       | 24.9 ± 4.7   | 26.7 ± 7.8   | NS                    | NS                | NS            |
| Spleen size (cm)                 | Not palpable (0) | 8.60 ± 5.8   | 8.30 ± 3.2   | S                     | S                 | NS            |
| ALT (U/L)                        | 33.1 ± 11        | 32.1 ± 15.0  | 30.4 ± 12.4  | NS                    | NS                | NS            |
| AST (U/L)                        | 41.0 ± 13        | 38.9 ± 14.9  | 43.2 ± 22.8  | NS                    | NS                | NS            |
| SB (mg/dl)                       | 1.50 ± 0.50      | 1.70 ± 0.90  | 1.70 ± 0.90  | NS                    | NS                | NS            |
| Albumin (mg/dl)                  | 4.2 ± 0.40       | 4.7 ± 0.60   | 4.2 ± 0.50   | NS                    | NS                | NS            |
| PT (seconds)                     | 14.6 ± 1.2       | 14.4 ± 2.0   | 13.6 ± 1.4   | NS                    | NS                | NS            |
| BA level (μmol/L)                | 43.8 ± 1.5       | 125.2 ± 45.3 | 130.2 ± 26.4 | S                     | S                 | S             |

<sup>a</sup> P < .05 was considered as statistically significant.

**On-line Table 2: Summary of MD values in healthy controls and patients with and without MHE in all age groups**

| Regions                                                                           | Healthy Controls | No MHE      | MHE         | P Values <sup>a</sup> |                   |               |
|-----------------------------------------------------------------------------------|------------------|-------------|-------------|-----------------------|-------------------|---------------|
|                                                                                   |                  |             |             | Control vs MHE        | Control vs No MHE | MHE vs No MHE |
| Pediatric age group (mean ± SD) MD values ( $\times 10^{-3}$ mm <sup>2</sup> /s)  |                  |             |             |                       |                   |               |
| FWM                                                                               | 0.74 ± 0.02      | 0.74 ± 0.01 | 0.79 ± 0.02 | <.001                 | 1.000             | <.001         |
| Genu                                                                              | 0.80 ± 0.03      | 0.81 ± 0.03 | 0.84 ± 0.05 | .036                  | 1.000             | .098          |
| Sp                                                                                | 0.73 ± 0.04      | 0.77 ± 0.04 | 0.78 ± 0.04 | .024                  | .053              | 1.000         |
| CG                                                                                | 0.75 ± 0.03      | 0.76 ± 0.03 | 0.87 ± 0.03 | <.001                 | .002              | <.001         |
| CN                                                                                | 0.74 ± 0.03      | 0.75 ± 0.04 | 0.79 ± 0.04 | .001                  | 1.000             | .010          |
| P                                                                                 | 0.69 ± 0.03      | 0.70 ± 0.02 | 0.73 ± 0.04 | .026                  | .837              | 0.207         |
| GP                                                                                | 0.71 ± 0.02      | 0.72 ± 0.02 | 0.79 ± 0.03 | <.001                 | .687              | <.001         |
| OWM                                                                               | 0.73 ± 0.04      | 0.75 ± 0.03 | 0.81 ± 0.06 | .001                  | .818              | .008          |
| ALIC                                                                              | 0.73 ± 0.03      | 0.73 ± 0.04 | 0.74 ± 0.04 | 1.000                 | 1.000             | .987          |
| PLIC                                                                              | 0.71 ± 0.04      | 0.70 ± 0.02 | 0.71 ± 0.04 | 1.000                 | 1.000             | 1.000         |
| T                                                                                 | 0.73 ± 0.03      | 0.73 ± 0.02 | 0.75 ± 0.02 | .464                  | 1.000             | .326          |
| Adolescent age group (mean ± SD) MD values ( $\times 10^{-3}$ mm <sup>2</sup> /s) |                  |             |             |                       |                   |               |
| FWM                                                                               | 0.67 ± 0.02      | 0.70 ± 0.04 | 0.75 ± 0.03 | .001                  | .164              | .069          |
| Genu                                                                              | 0.72 ± 0.02      | 0.73 ± 0.04 | 0.76 ± 0.03 | .020                  | 1.000             | .028          |
| Sp                                                                                | 0.71 ± 0.03      | 0.72 ± 0.03 | 0.72 ± 0.01 | 1.000                 | .441              | 1.000         |
| CG                                                                                | 0.71 ± 0.05      | 0.76 ± 0.04 | 0.81 ± 0.04 | .001                  | .069              | .162          |
| CN                                                                                | 0.70 ± 0.01      | 0.74 ± 0.03 | 0.77 ± 0.03 | <.001                 | .012              | .184          |
| P                                                                                 | 0.66 ± 0.01      | 0.68 ± 0.02 | 0.71 ± 0.02 | <.001                 | .084              | .045          |
| GP                                                                                | 0.68 ± 0.02      | 0.70 ± 0.01 | 0.74 ± 0.03 | <.001                 | .364              | .006          |
| OWM                                                                               | 0.67 ± 0.03      | 0.72 ± 0.02 | 0.74 ± 0.03 | .001                  | .006              | .779          |
| ALIC                                                                              | 0.71 ± 0.02      | 0.73 ± 0.02 | 0.73 ± 0.03 | .457                  | .541              | 1.000         |
| PLIC                                                                              | 0.64 ± 0.03      | 0.65 ± 0.02 | 0.68 ± 0.02 | .013                  | 1.000             | .050          |
| T                                                                                 | 0.68 ± 0.02      | 0.71 ± 0.02 | 0.73 ± 0.04 | .003                  | .036              | .538          |
| Adult age group (mean ± SD) MD values ( $\times 10^{-3}$ mm <sup>2</sup> /s)      |                  |             |             |                       |                   |               |
| FWM                                                                               | 0.69 ± 0.02      | 0.71 ± 0.03 | 0.73 ± 0.02 | <.001                 | .050              | .483          |
| Genu                                                                              | 0.72 ± 0.01      | 0.72 ± 0.02 | 0.73 ± 0.03 | .567                  | 1.000             | 1.000         |
| Sp                                                                                | 0.72 ± 0.05      | 0.72 ± 0.04 | 0.72 ± 0.03 | 1.000                 | 1.000             | 1.000         |
| CG                                                                                | 0.71 ± 0.03      | 0.74 ± 0.05 | 0.76 ± 0.03 | .005                  | .140              | .840          |
| CN                                                                                | 0.71 ± 0.03      | 0.72 ± 0.02 | 0.76 ± 0.06 | .002                  | 1.000             | .070          |
| P                                                                                 | 0.66 ± 0.02      | 0.67 ± 0.03 | 0.71 ± 0.04 | <.001                 | 1.000             | .005          |
| GP                                                                                | 0.69 ± 0.02      | 0.70 ± 0.03 | 0.72 ± 0.03 | .013                  | 1.000             | .250          |
| OWM                                                                               | 0.69 ± 0.04      | 0.72 ± 0.02 | 0.74 ± 0.04 | .001                  | .046              | .638          |
| ALIC                                                                              | 0.70 ± 0.02      | 0.71 ± 0.03 | 0.74 ± 0.03 | .004                  | 1.000             | .022          |
| PLIC                                                                              | 0.66 ± 0.03      | 0.64 ± 0.02 | 0.69 ± 0.04 | .043                  | .981              | .011          |
| T                                                                                 | 0.68 ± 0.03      | 0.70 ± 0.02 | 0.71 ± 0.03 | .043                  | .290              | 1.000         |

<sup>a</sup>  $P < .05$  was considered as statistically significant.

**On-line Table 3: Summary of FA values in healthy controls and in patients with and without MHE in all age groups**

| Regions                                    | Healthy Controls | No MHE      | MHE         | P Values <sup>a</sup> |                   |               |
|--------------------------------------------|------------------|-------------|-------------|-----------------------|-------------------|---------------|
|                                            |                  |             |             | Control vs MHE        | Control vs No MHE | MHE vs No MHE |
| Pediatric age group (mean ± SD) FA values  |                  |             |             |                       |                   |               |
| FWM                                        | 0.28 ± 0.07      | 0.29 ± 0.04 | 0.29 ± 0.02 | 1.00                  | 1.00              | 1.00          |
| Genu                                       | 0.44 ± 0.05      | 0.46 ± 0.07 | 0.46 ± 0.05 | .77                   | .50               | 1.00          |
| Sp                                         | 0.53 ± 0.07      | 0.48 ± 0.13 | 0.48 ± 0.05 | .86                   | .46               | 1.00          |
| CG                                         | 0.13 ± 0.05      | 0.12 ± 0.04 | 0.11 ± 0.01 | .88                   | 1.00              | 1.00          |
| CN                                         | 0.09 ± 0.01      | 0.08 ± 0.01 | 0.09 ± 0.01 | 1.00                  | 1.00              | 1.00          |
| P                                          | 0.11 ± 0.02      | 0.10 ± 0.02 | 0.09 ± 0.01 | .13                   | 1.00              | 1.00          |
| GP                                         | 0.10 ± 0.01      | 0.10 ± 0.02 | 0.09 ± 0.01 | .28                   | .22               | 1.00          |
| OWM                                        | 0.43 ± 0.07      | 0.46 ± 0.06 | 0.45 ± 0.06 | 1.00                  | .33               | 1.00          |
| ALIC                                       | 0.33 ± 0.07      | 0.34 ± 0.04 | 0.34 ± 0.03 | 1.00                  | 1.00              | 1.00          |
| PLIC                                       | 0.40 ± 0.12      | 0.43 ± 0.03 | 0.42 ± 0.02 | 1.00                  | .17               | .92           |
| T                                          | 0.12 ± 0.03      | 0.15 ± 0.02 | 0.15 ± 0.01 | 1.00                  | 1.00              | 1.00          |
| Adolescent age group (mean ± SD) FA values |                  |             |             |                       |                   |               |
| FWM                                        | 0.32 ± 0.04      | 0.31 ± 0.05 | 0.32 ± 0.06 | 1.00                  | 1.00              | 1.00          |
| Genu                                       | 0.55 ± 0.08      | 0.43 ± 0.15 | 0.46 ± 0.08 | .51                   | .13               | 1.00          |
| Sp                                         | 0.50 ± 0.16      | 0.53 ± 0.09 | 0.46 ± 0.17 | .71                   | 1.00              | .28           |
| CG                                         | 0.13 ± 0.03      | 0.13 ± 0.03 | 0.12 ± 0.02 | 1.00                  | 1.00              | 1.00          |
| CN                                         | 0.13 ± 0.08      | 0.12 ± 0.09 | 0.14 ± 0.09 | 1.00                  | 1.00              | 1.00          |
| P                                          | 0.11 ± 0.03      | 0.11 ± 0.03 | 0.12 ± 0.07 | 1.00                  | 1.00              | 1.00          |
| GP                                         | 0.12 ± 0.03      | 0.13 ± 0.04 | 0.13 ± 0.02 | 1.00                  | 1.00              | 1.00          |
| OWM                                        | 0.42 ± 0.08      | 0.42 ± 0.08 | 0.41 ± 0.07 | 1.00                  | 1.00              | 1.00          |
| ALIC                                       | 0.33 ± 0.03      | 0.33 ± 0.05 | 0.28 ± 0.05 | .18                   | 1.00              | .12           |
| PLIC                                       | 0.45 ± 0.03      | 0.47 ± 0.03 | 0.46 ± 0.02 | 1.00                  | .37               | 1.00          |
| T                                          | 0.16 ± 0.02      | 0.16 ± 0.02 | 0.16 ± 0.02 | 1.00                  | 1.00              | 1.00          |
| Adult age group (mean ± SD) FA values      |                  |             |             |                       |                   |               |
| FWM                                        | 0.31 ± 0.04      | 0.30 ± 0.03 | 0.28 ± 0.04 | .14                   | .60               | 1.00          |
| Genu                                       | 0.50 ± 0.04      | 0.47 ± 0.03 | 0.48 ± 0.05 | .62                   | .11               | 1.00          |
| Sp                                         | 0.57 ± 0.09      | 0.49 ± 0.11 | 0.54 ± 0.11 | 1.00                  | .10               | .68           |
| CG                                         | 0.14 ± 0.02      | 0.14 ± 0.03 | 0.13 ± 0.02 | .82                   | 1.00              | 1.00          |
| CN                                         | 0.10 ± 0.02      | 0.11 ± 0.05 | 0.11 ± 0.03 | .72                   | .57               | 1.00          |
| P                                          | 0.14 ± 0.07      | 0.12 ± 0.04 | 0.13 ± 0.07 | 1.00                  | 1.00              | 1.00          |
| GP                                         | 0.16 ± 0.05      | 0.14 ± 0.04 | 0.15 ± 0.05 | 1.00                  | .86               | 1.00          |
| OWM                                        | 0.44 ± 0.06      | 0.40 ± 0.09 | 0.41 ± 0.07 | .85                   | .32               | 1.00          |
| ALIC                                       | 0.34 ± 0.05      | 0.33 ± 0.03 | 0.35 ± 0.06 | 1.00                  | 1.00              | 1.00          |
| PLIC                                       | 0.43 ± 0.05      | 0.44 ± 0.02 | 0.44 ± 0.06 | 1.00                  | 1.00              | 1.00          |
| T                                          | 0.16 ± 0.04      | 0.16 ± 0.03 | 0.16 ± 0.03 | 1.00                  | 1.00              | 1.00          |

<sup>a</sup> P < .05 was considered as statistically significant.**On-line Table 4: Summary of metabolite concentrations in healthy controls and in patients with and without MHE in 3 different age groups**

| Metabolite Concentrations (mmol/kg) | Healthy Controls | No MHE     | MHE         | P Values <sup>a</sup> |                   |               |
|-------------------------------------|------------------|------------|-------------|-----------------------|-------------------|---------------|
|                                     |                  |            |             | Control vs MHE        | Control vs No MHE | MHE vs No MHE |
| Pediatric age group (mean ± SD)     |                  |            |             |                       |                   |               |
| Glx                                 | 14.4 ± 1.5       | 15.4 ± 1.7 | 17.7 ± 2.5  | .001                  | .060              | .500          |
| Myo-inositol                        | 3.6 ± 1.00       | 3.5 ± 0.74 | 3.5 ± 0.70  | 1.000                 | 1.000             | 1.000         |
| Choline                             | 1.4 ± 0.17       | 1.3 ± 0.15 | 1.4 ± 0.24  | 1.000                 | .800              | .600          |
| NAA                                 | 7.8 ± 1.00       | 7.9 ± 0.70 | 7.9 ± 0.80  | 1.000                 | 1.000             | 1.000         |
| Creatine                            | 7.0 ± 1.0        | 6.5 ± 0.83 | 6.6 ± 0.73  | .722                  | .693              | 1.000         |
| Adolescent age group (mean ± SD)    |                  |            |             |                       |                   |               |
| Glx                                 | 14.5 ± 2.2       | 15.5 ± 1.5 | 17.4 ± 1.9  | .043                  | .850              | .201          |
| Myo-inositol                        | 3.2 ± 1.10       | 3.1 ± 1.00 | 2.2 ± 1.10  | .780                  | 1.000             | .770          |
| Choline                             | 1.4 ± 0.35       | 1.3 ± 0.31 | 1.4 ± 0.340 | 1.000                 | 1.000             | 1.000         |
| NAA                                 | 7.8 ± 1.60       | 7.6 ± 1.40 | 7.5 ± 1.90  | .780                  | 1.000             | .720          |
| Creatine                            | 7.0 ± 1.4        | 6.4 ± 1.0  | 6.1 ± 1.2   | 1.000                 | .809              | 1.000         |
| Adult age group (mean ± SD)         |                  |            |             |                       |                   |               |
| Glx                                 | 13.6 ± 2.2       | 14.7 ± 2.6 | 17.6 ± 3.4  | <.001                 | .739              | .026          |
| Myo-inositol                        | 3.3 ± 0.70       | 2.8 ± 0.79 | 1.6 ± 0.52  | <.001                 | .083              | .001          |
| Choline                             | 1.3 ± 0.34       | 1.4 ± 0.40 | 1.4 ± 0.32  | 1.000                 | .610              | 1.000         |
| NAA                                 | 7.1 ± 1.2        | 7.2 ± 1.3  | 7.2 ± 2.20  | 1.000                 | 1.000             | 1.000         |
| Creatine                            | 6.2 ± 0.80       | 6.7 ± 1.0  | 6.1 ± 0.72  | .385                  | 1.000             | .182          |

<sup>a</sup> P < .05 was considered as statistically significant.
